# Supplementary material for: Molecular landscapes of glioblastoma cell lines revealed a group of patients that do not benefit from WWOX tumor suppressor expression
Source: Front Neurosci. 2023 Sep 15;17:1260409. doi: 10.3389/fnins.2023.1260409 (PMC10540236; doi:10.3389/fnins.2023.1260409)
Supplement: Supplementary file 12 [file Table_7.XLSX]

## Sheet: Suppl.Table 7 Title
	Supplementary Table 7 – Additional data for patients subjected to principal component analysis.
	Additional data for patients subjected to Principal Component Analysis. Data were obtained from:
		Reclassification of TCGA Diffuse Glioma Profiles Linked to Transcriptomic, Epigenetic, Genomic and Clinical Data, According to the 2021 WHO CNS Tumor Classification (doi: 10.3390/ijms24010157)
		The cBio cancer genomics portal: an open platform for exploring multidimensional cancer genomics data (doi: 10.1158/2159-8290.CD-12-0095)
		The Somatic Genomic Landscape of Glioblastoma (doi: 10.1016/j.cell.2013.09.034)
		Tumor Evolution of Glioma-Intrinsic Gene Expression Subtypes Associates with Immunological Changes in the Microenvironment (doi: 10.1016/j.ccell.2017.06.003)
		Predicting tumor response to drugs based on gene-expression biomarkers of sensitivity learned from cancer cell lines (doi: 10.1186/s12864-021-07581-7)

## Sheet: Additional data for patients
id	Cell lines-resembling group	Acquired from 10.3390/ijms24010157										Acquired from cBioPortal (TCGA-GBM PanCancer Atlas) 10.1158/2159-8290.CD-12-0095									Acquired from 10.1016/j.cell.2013.09.034		Acquired from 10.1016/j.ccell.2017.06.003	Acquired from 10.1186/s12864-021-07581-7
		Chr 7 gain/Chr 10 loss	1p/19q codeletion	IDH status	TERT promoter status	ATRX status	H3 K27,G34 status	MGMT promoter status	EGFR CNA	CDKN2A CNA	CDKN2B CNA	MTAP CNA	PTEN status	TP53 status	TTN status	EGFR status	MUC16 status	FLG status	NF1 status	RYR2 status	G-CIMP methylation	Expression subclass (Brennan, 2013)	Expression subclass (Wang, 2017)	Drug Sensitivity Prediction for Temozolomide
TCGA-06-0125	DBTRG-like_vec	No combined CNA	non-codel	WT	Mutant	WT	WT	Methylated	2	-2	-2	-2	Mutant	WT	WT	Mutant	Mutant	WT	WT	WT	non-G-CIMP	Classical	Classical	6.0720
TCGA-06-0187	DBTRG-like_vec	No combined CNA	non-codel	WT	unknown	unknown	WT	unknown	2	-2	-2	-2	Mutant	WT	WT	WT	WT	WT	WT	WT	non-G-CIMP	Classical	Classical	6.1260
TCGA-06-0744	DBTRG-like_vec	Gain chr 7 & loss chr 10	non-codel	WT	Mutant	WT	WT	unknown	2	-1	-1	-1	WT	Mutant	Mutant	WT	WT	WT	WT	WT	non-G-CIMP	Classical	Classical	5.9440
TCGA-06-2559	DBTRG-like_vec	No combined CNA	non-codel	WT	unknown	WT	WT	Methylated	1	0	0	0	Mutant	Mutant	WT	WT	WT	WT	WT	Mutant	non-G-CIMP	Proneural	Proneural	6.0560
TCGA-06-2561	DBTRG-like_vec	Gain chr 7 & loss chr 10	non-codel	WT	unknown	WT	WT	Unmethylated	1	-2	-2	-2	Mutant	WT	Mutant	Mutant	WT	WT	WT	WT	non-G-CIMP	Mesenchymal	Classical	6.0580
TCGA-06-2564	DBTRG-like_vec	Gain chr 7 & loss chr 10	non-codel	WT	unknown	WT	WT	Unmethylated	2	-1	-1	-1	WT	WT	Mutant	WT	WT	Mutant	WT	WT	non-G-CIMP	Classical	Classical	6.1690
TCGA-12-3650	DBTRG-like_vec	Gain chr 7 & loss chr 10	non-codel	WT	unknown	WT	WT	Unmethylated	2	-2	-2	-2	WT	WT	WT	Mutant	Mutant	WT	WT	WT	non-G-CIMP	Proneural	Proneural	5.9670
TCGA-16-1045	DBTRG-like_vec	Gain chr 7 & loss chr 10	non-codel	WT	unknown	WT	WT	Methylated	2	-2	-2	-2	Mutant	WT	Mutant	Mutant	WT	WT	WT	WT	non-G-CIMP	Mesenchymal	Mesenchymal	6.1430
TCGA-27-1837	DBTRG-like_vec	No combined CNA	non-codel	WT	unknown	WT	WT	Methylated	2	-2	-2	-2	Mutant	WT	WT	WT	WT	WT	WT	WT	non-G-CIMP	Classical	Classical	6.0370
TCGA-28-1753	DBTRG-like_vec	Gain chr 7 & loss chr 10	non-codel	WT	unknown	WT	WT	Unmethylated	2	-2	-2	-1	Mutant	Mutant	Mutant	WT	WT	WT	WT	WT	non-G-CIMP	Mesenchymal	Mesenchymal	6.1160
TCGA-32-2638	DBTRG-like_vec	Gain chr 7 & loss chr 10	non-codel	WT	unknown	WT	WT	Methylated	2	-1	-1	-1	WT	WT	WT	WT	WT	WT	WT	WT	non-G-CIMP	Classical	Classical	6.1130
TCGA-41-2572	DBTRG-like_vec	Gain chr 7 & loss chr 10	non-codel	WT	unknown	WT	WT	Unmethylated	2	-1	-1	-1	WT	WT	Mutant	WT	WT	WT	WT	WT	non-G-CIMP	Classical	Classical	6.0530
TCGA-76-4928	DBTRG-like_vec	Gain chr 7 & loss chr 10	non-codel	WT	unknown	WT	WT	Methylated	1	-2	-2	-2	WT	WT	WT	WT	WT	Mutant	WT	WT	non-G-CIMP	Classical	Classical	6.2460
TCGA-06-0649	DBTRG-like_wwox	Gain chr 7 & loss chr 10	non-codel	WT	unknown	WT	WT	unknown	1	-2	-2	-1	WT	WT	WT	Mutant	WT	WT	WT	WT	non-G-CIMP	Neural	Mesenchymal	6.1140
TCGA-06-0745	DBTRG-like_wwox	Gain chr 7 & loss chr 10	non-codel	WT	Mutant	WT	WT	unknown	2	-2	-2	-2	WT	WT	WT	WT	Mutant	WT	WT	WT	non-G-CIMP	Proneural	Proneural	5.9810
TCGA-06-2567	DBTRG-like_wwox	Gain chr 7 & loss chr 10	non-codel	WT	unknown	WT	WT	Methylated	1	-1	-1	-1	WT	Mutant	WT	Mutant	WT	WT	WT	WT	non-G-CIMP	Neural	Classical	6.0990
TCGA-06-5412	DBTRG-like_wwox	No combined CNA	non-codel	WT	unknown	WT	WT	Methylated	1	-1	-1	-1	Mutant	WT	WT	WT	WT	WT	Mutant	Mutant	non-G-CIMP	Mesenchymal	Mesenchymal	6.1510
TCGA-06-5413	DBTRG-like_wwox	Gain chr 7 & loss chr 10	non-codel	WT	unknown	WT	WT	Unmethylated	2	-2	-2	-2	WT	WT	Mutant	WT	WT	WT	WT	Mutant	non-G-CIMP	Neural	Mesenchymal	6.0180
TCGA-12-0821	DBTRG-like_wwox	Gain chr 7 & loss chr 10	non-codel	WT	unknown	WT	WT	Unmethylated	2	-2	-2	-1	WT	WT	WT	WT	WT	WT	WT	WT	non-G-CIMP	Neural	Proneural	6.0680
TCGA-12-5299	DBTRG-like_wwox	Gain chr 7 & loss chr 10	non-codel	WT	unknown	WT	WT	Unmethylated	1	-2	-2	-2	WT	WT	WT	WT	WT	WT	WT	WT	non-G-CIMP	Classical	Classical	6.2060
TCGA-19-2625	DBTRG-like_wwox	No combined CNA	non-codel	WT	unknown	WT	WT	Unmethylated	0	-1	-1	-1	Mutant	Mutant	WT	WT	Mutant	WT	WT	WT	non-G-CIMP	Classical	Classical	6.1720
TCGA-27-2526	DBTRG-like_wwox	No combined CNA	non-codel	WT	unknown	WT	WT	Unmethylated	2	-1	-1	-1	Mutant	WT	WT	WT	Mutant	WT	WT	WT	non-G-CIMP	Neural	Classical	6.0750
TCGA-28-5208	DBTRG-like_wwox	No combined CNA	non-codel	WT	unknown	WT	WT	Methylated	1	-2	-2	-2	WT	WT	WT	WT	WT	WT	Mutant	WT	non-G-CIMP	Mesenchymal	Mesenchymal	6.0940
TCGA-02-0055	UTU-like_vec	No combined CNA	non-codel	WT	unknown	WT	WT	Unmethylated	1	0	0	0	Mutant	Mutant	Mutant	WT	WT	WT	WT	WT	non-G-CIMP	Mesenchymal	Mesenchymal	6.2670
TCGA-02-2486	UTU-like_vec	Gain chr 7 & loss chr 10	non-codel	WT	unknown	WT	WT	Unmethylated	1	-2	-2	-2	WT	WT	WT	WT	WT	WT	WT	WT	non-G-CIMP	Mesenchymal	Mesenchymal	6.1710
TCGA-06-0130	UTU-like_vec	No combined CNA	non-codel	WT	unknown	WT	WT	Unmethylated	1	1	1	1	WT	Mutant	Mutant	WT	WT	WT	WT	WT	non-G-CIMP	Mesenchymal	Mesenchymal	6.1600
TCGA-06-0156	UTU-like_vec	unknown	unknown	Mutant	unknown	unknown	WT	unknown	unknown	unknown	unknown	unknown	unknown	unknown	unknown	unknown	unknown	unknown	unknown	unknown	non-G-CIMP	Proneural	Proneural	6.0490
TCGA-06-0644	UTU-like_vec	Gain chr 7 & loss chr 10	non-codel	WT	unknown	WT	WT	unknown	1	-2	-2	-2	Mutant	Mutant	WT	WT	WT	WT	WT	WT	non-G-CIMP	Mesenchymal	Mesenchymal	6.2410
TCGA-06-5410	UTU-like_vec	No combined CNA	non-codel	WT	unknown	WT	WT	Methylated	1	-1	-1	-1	WT	WT	WT	WT	WT	WT	Mutant	WT	non-G-CIMP	Mesenchymal	Mesenchymal	6.2090
TCGA-06-5416	UTU-like_vec	No combined CNA	non-codel	WT (maf)	unknown	unknown	WT	Unmethylated	0	1	1	1	WT	Mutant	Mutant	Mutant	Mutant	Mutant	Mutant	WT	non-G-CIMP	Proneural	Proneural	6.0540
TCGA-06-5418	UTU-like_vec	Gain chr 7 & loss chr 10	non-codel	WT	unknown	WT	WT	Unmethylated	1	-2	-2	-2	Mutant	WT	WT	WT	WT	WT	WT	WT	non-G-CIMP	Mesenchymal	Mesenchymal	6.1560
TCGA-06-5859	UTU-like_vec	Gain chr 7 & loss chr 10	non-codel	WT	unknown	WT	WT	Unmethylated	1	-2	-2	-1	WT	WT	WT	WT	WT	WT	WT	WT	non-G-CIMP	Neural	Classical	6.0490
TCGA-14-1829	UTU-like_vec	Gain chr 7 & loss chr 10	non-codel	WT	unknown	WT	WT	Unmethylated	2	-2	-2	-2	WT	WT	WT	WT	Mutant	WT	WT	WT	non-G-CIMP	Neural	Mesenchymal	6.1430
TCGA-27-1831	UTU-like_vec	Gain chr 7 & loss chr 10	non-codel	WT	Mutant	WT	WT	Unmethylated	2	-1	-1	-1	WT	WT	WT	Mutant	Mutant	WT	WT	WT	non-G-CIMP	Neural	Classical	6.1890
TCGA-27-2521	UTU-like_vec	No combined CNA	non-codel	Mutant	unknown	Mutant	WT	Methylated	0	-2	-2	-2	WT	Mutant	WT	WT	WT	WT	WT	WT	G-CIMP	G-CIMP	Proneural	6.0010
TCGA-27-2524	UTU-like_vec	Gain chr 7 & loss chr 10	non-codel	WT	unknown	WT	WT	Unmethylated	1	-2	-2	-1	Mutant	WT	WT	WT	Mutant	WT	WT	WT	non-G-CIMP	Mesenchymal	Mesenchymal	6.2100
TCGA-02-2485	UTU-like_wwox	Gain chr 7 & loss chr 10	non-codel	WT	Mutant	WT	WT	Unmethylated	1	0	0	0	WT	Mutant	WT	Mutant	Mutant	Mutant	WT	WT	non-G-CIMP	Classical	Classical	6.0000
TCGA-06-5856	UTU-like_wwox	Gain chr 7 & loss chr 10	non-codel	WT	unknown	WT	WT	Unmethylated	2	-1	-1	-1	WT	WT	WT	Mutant	WT	WT	WT	WT	non-G-CIMP	Classical	Classical	6.0780
TCGA-12-3653	UTU-like_wwox	Gain chr 7 & loss chr 10	non-codel	WT	unknown	WT	WT	Unmethylated	2	-2	-2	-2	WT	WT	WT	WT	WT	WT	WT	Mutant	non-G-CIMP	Classical	Classical	6.0240
TCGA-19-2620	UTU-like_wwox	No combined CNA	non-codel	WT	Mutant	WT	WT	Methylated	2	-2	-2	-2	WT	WT	WT	Mutant	WT	WT	WT	WT	non-G-CIMP	Neural	Classical	6.1520
TCGA-26-5134	UTU-like_wwox	No combined CNA	non-codel	WT	unknown	WT	WT	Unmethylated	0	-2	-2	-1	WT	WT	WT	WT	WT	WT	WT	WT	non-G-CIMP	Proneural	Proneural	5.9750
TCGA-27-1835	UTU-like_wwox	Gain chr 7 & loss chr 10	non-codel	WT	unknown	WT	WT	Methylated	1	0	0	0	WT	Mutant	WT	WT	WT	WT	WT	WT	non-G-CIMP	Classical	Classical	5.9880
TCGA-27-2519	UTU-like_wwox	Gain chr 7 & loss chr 10	non-codel	WT	unknown	WT	WT	Unmethylated	1	0	0	0	Mutant	Mutant	WT	WT	WT	WT	WT	WT	non-G-CIMP	Mesenchymal	Mesenchymal	6.0850
TCGA-76-4932	UTU-like_wwox	unknown	unknown	WT	unknown	WT	WT	Methylated	unknown	unknown	unknown	unknown	WT	WT	WT	WT	WT	WT	WT	WT	non-G-CIMP	Proneural	Proneural	6.0730
